# Supplementary material
Source: PubMed Central journal article supplement (PMC2915560)
Supplement: NIHMS220096-supplement-01.pdf [file NIHMS220096-supplement-01.pdf]

|            |   | rs241432       |                |              |
|------------|---|----------------|----------------|--------------|
|            |   | 0              | 1              | 2            |
|            | 0 | 691<br>(506)   | 437<br>(649)   | 250<br>(223) |
| rs241429   | 1 | 707<br>(890)   | 1562<br>(1143) | 156<br>(392) |
|            | 2 | 401<br>(403)   | 311<br>(518)   | 386<br>(177) |
|            |   | rs9272346      |                |              |
|            |   | 0              | 1              | 2            |
|            | 0 | 751<br>(704)   | 462<br>(542)   | 165<br>(131) |
| rs241429   | 1 | 1226<br>(1239) | 986<br>(954)   | 213<br>(231) |
|            | 2 | 528<br>(561)   | 481<br>(432)   | 89<br>(105)  |
|            |   | rs17696736     |                |              |
|            |   | 0              | 1              | 2            |
|            | 0 | 1173<br>(1218) | 2052<br>(2043) | 865<br>(830) |
| rs11066119 | 1 | 264<br>(232)   | 392<br>(389)   | 122<br>(158) |
|            | 2 | 22<br>(10)     | 4<br>(16)      | 7<br>(7)     |

**Supplementary Table A.** Genotype by genotype counts (expected counts) for those SNP-SNP pairs with significant interactions.
